# Supplementary material for: Decadal-scale relationship between measurements of aerosols, land-use change, and fire over Southeast Asia
Source: Copernicus journal article supplement (doi:10.5194/acp-17-721-2017), 2017-01-16
Supplement: Supplementary file [file acp-17-721-2017-supplement.pdf]

Supplement of Atmos. Chem. Phys., 17, 721–743, 2017  
<http://www.atmos-chem-phys.net/17/721/2017/>  
doi:10.5194/acp-17-721-2017-supplement  
© Author(s) 2017. CC Attribution 3.0 License.

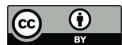

*Supplement of*

## **Decadal-scale relationship between measurements of aerosols, land-use change, and fire over Southeast Asia**

**Jason Blake Cohen et al.**

*Correspondence to:* Jason Blake Cohen (jasonbc@alum.mit.edu)

The copyright of individual parts of the supplement might differ from the CC-BY 3.0 licence.

**Supplement Figure S1.** Regression coefficients associated to LAI for REG1 (a) and REG2 (b).

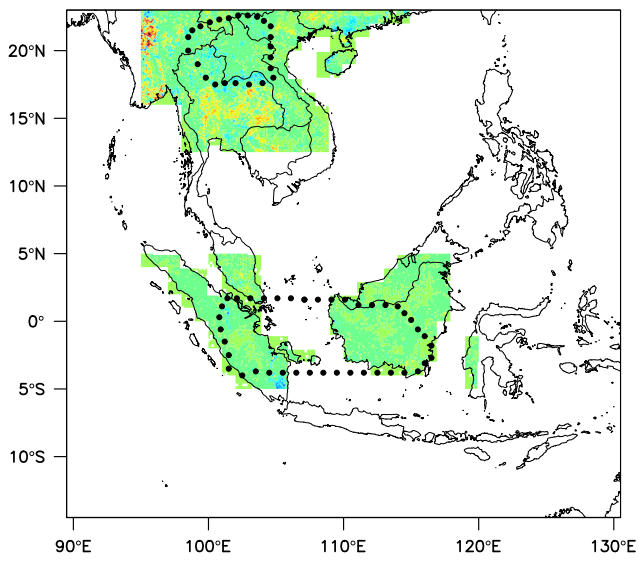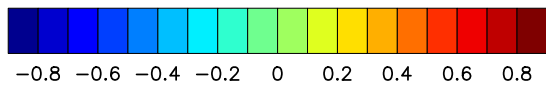

(a)  $\alpha_1$  with REG1

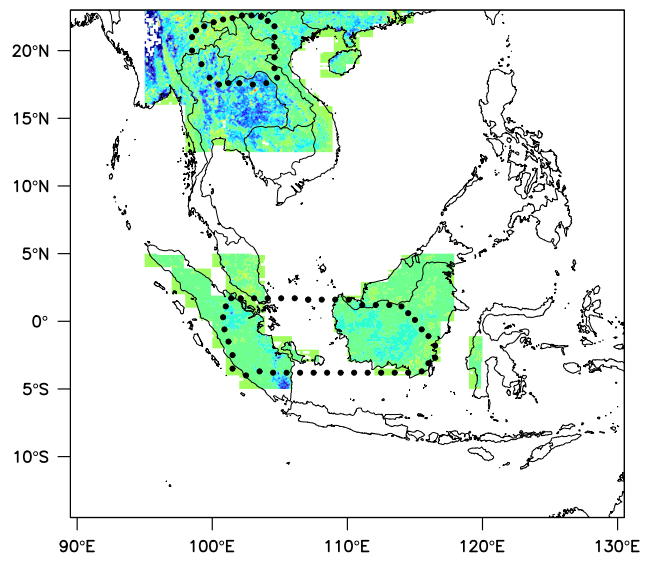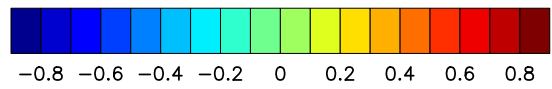

(b)  $\alpha_1$  with REG2

**Supplement Figure S2.** Regression coefficients associated to NDVI for REG1 (a) and REG2 (b).

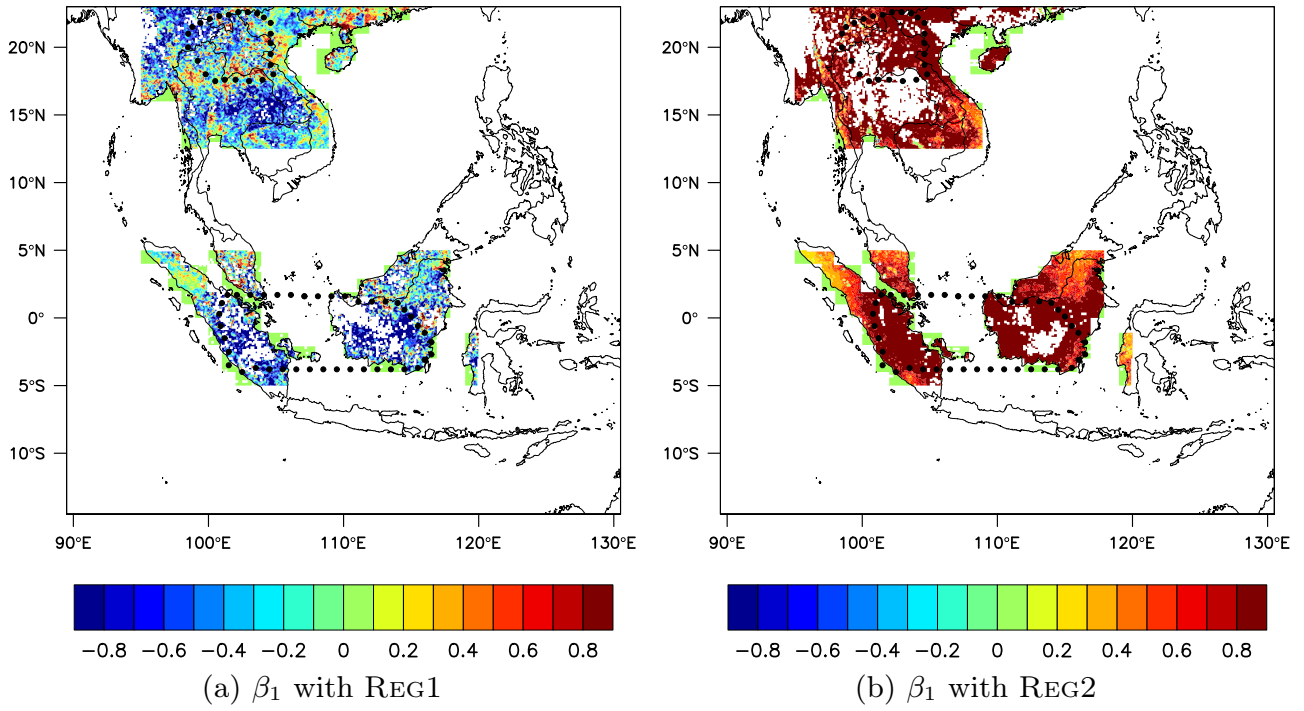

**Supplement Figure S3.** Temporal series of AERONET AOD (black), AODNorth (blue), and AOD from MISR (red) at four stations of the Northern region (2001-2013).

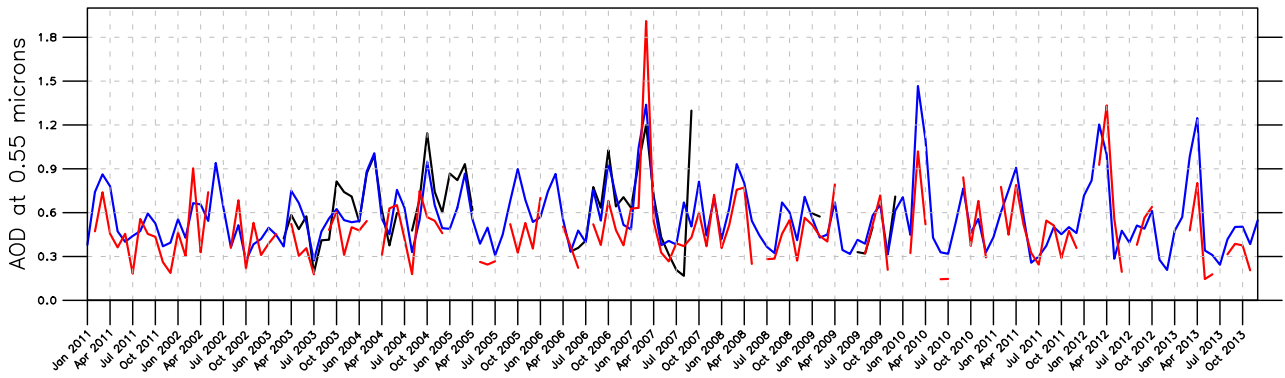

(a) Bac Giang

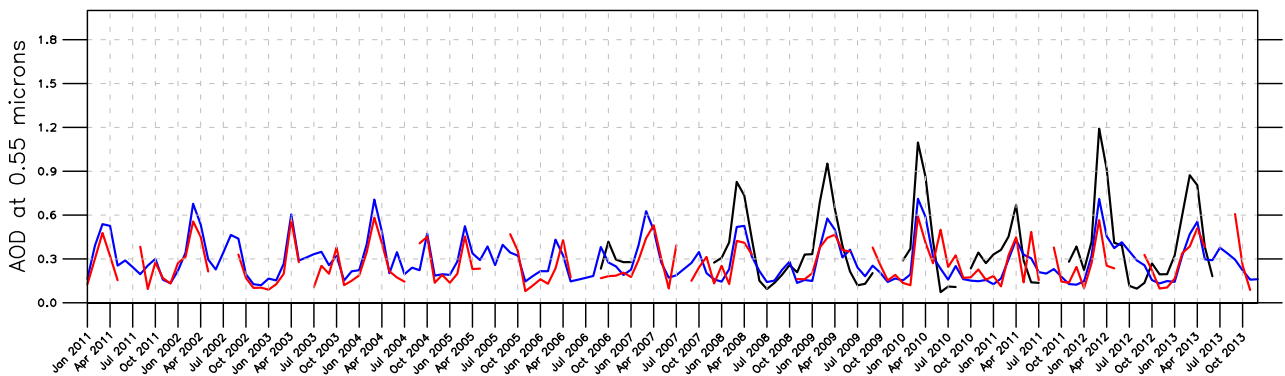

(b) Chiang Mai

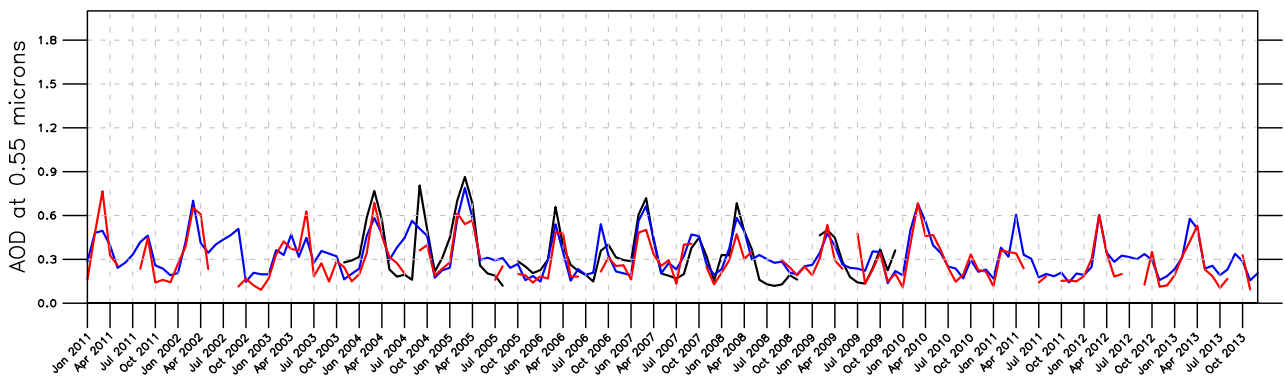

(c) Mukdahan

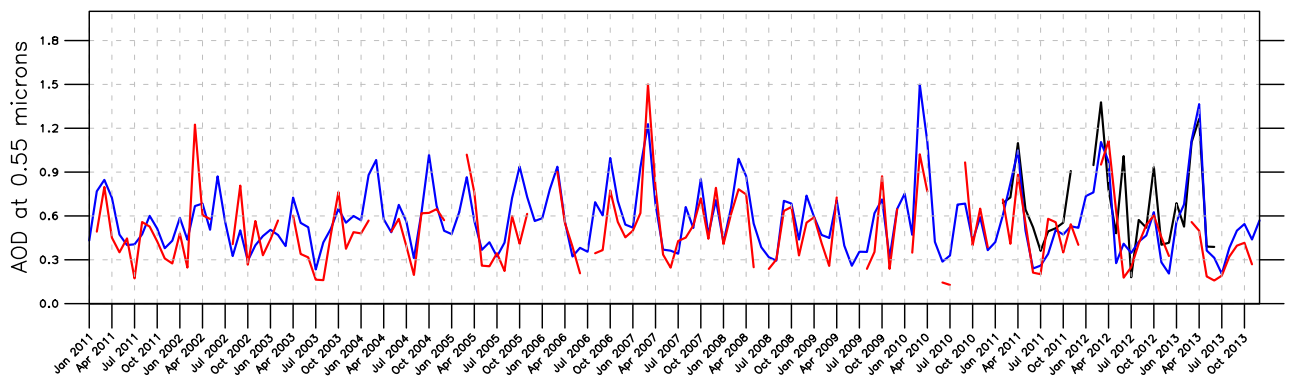

(d) Nghia Do

**Supplement Figure S4.** Temporal series of AERONET AOD (black), AODNorth (blue), and AOD from MISR (red) at three stations of the Northern region (2001-2013).

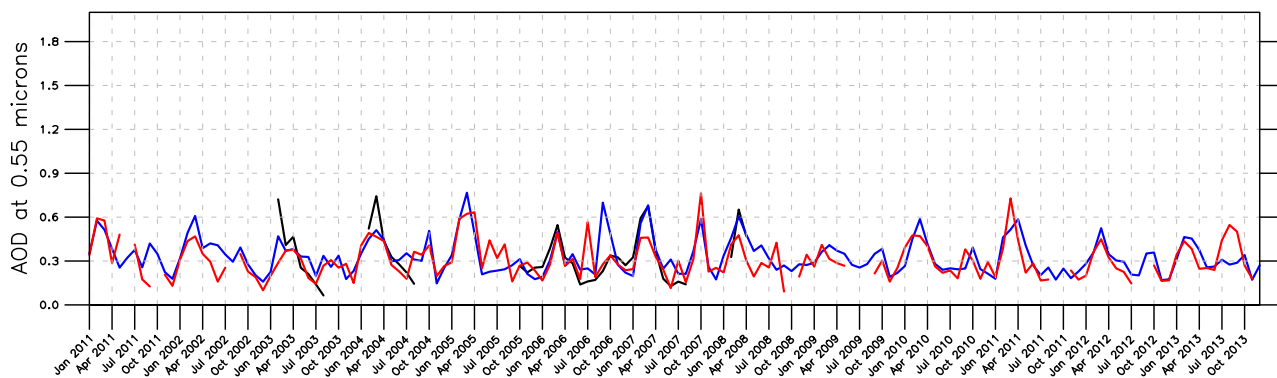

(a) Pimai

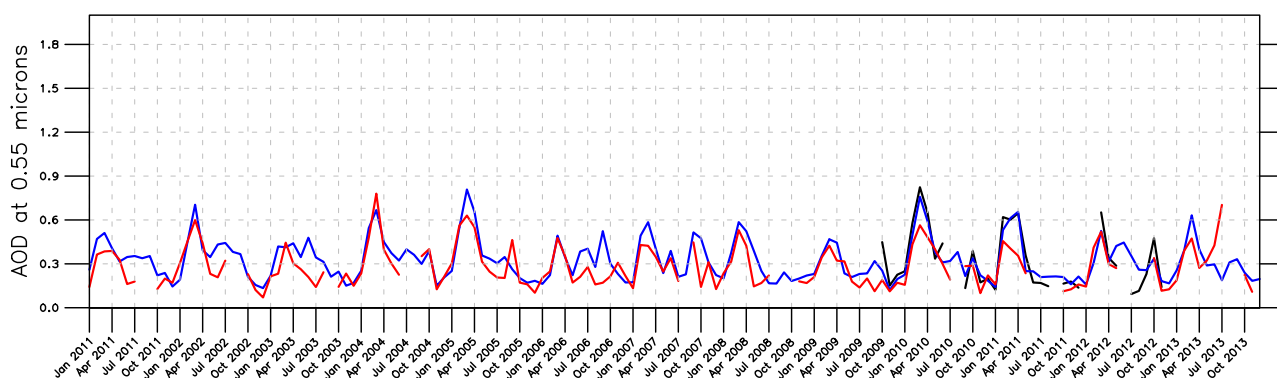

(b) Ubon Ratchathani

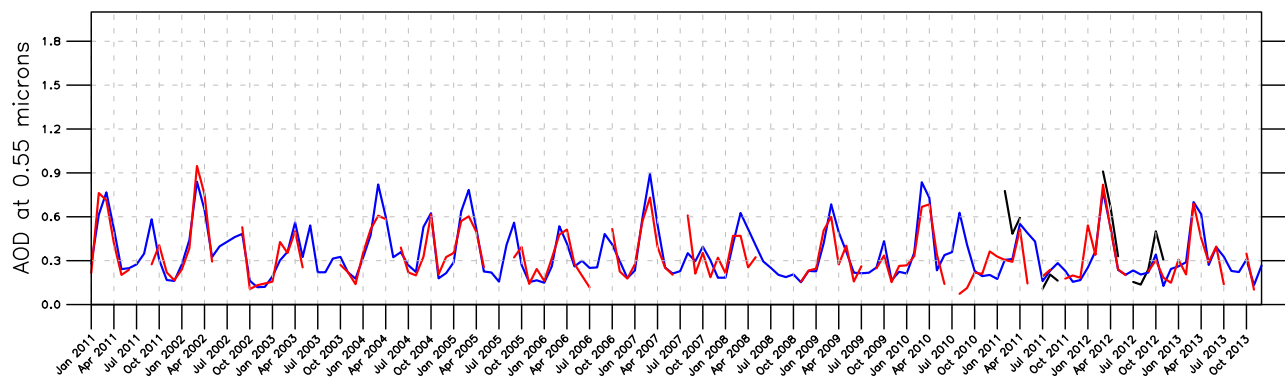

(c) Vientiane

**Supplement Figure S5.** Temporal series of AERONET AOD (black), AODNorth (blue), and AOD from MISR (red) at two stations of the Southern region (2001-2013).

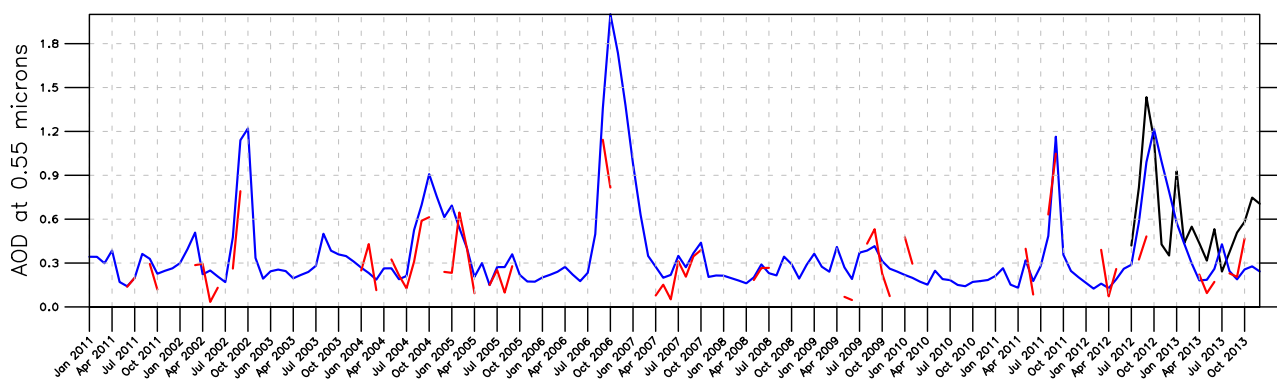

(a) Jambi

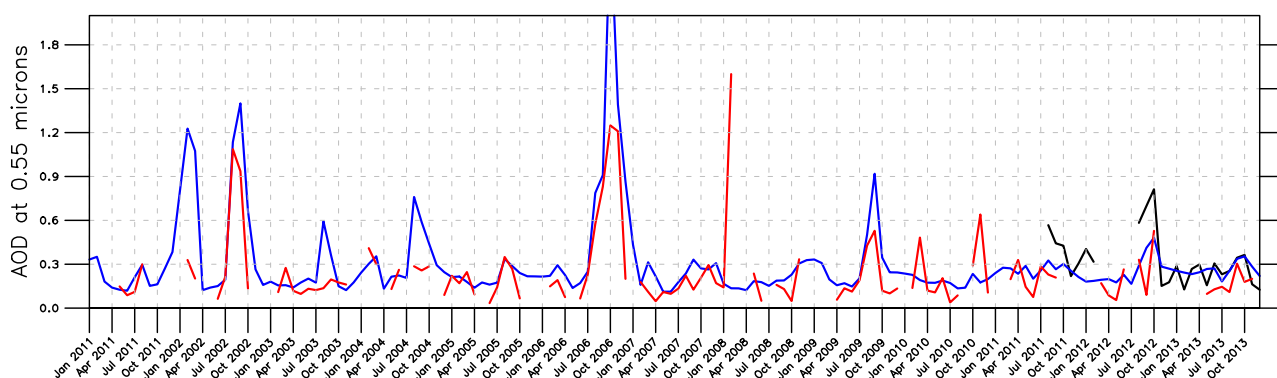

(b) Kuching

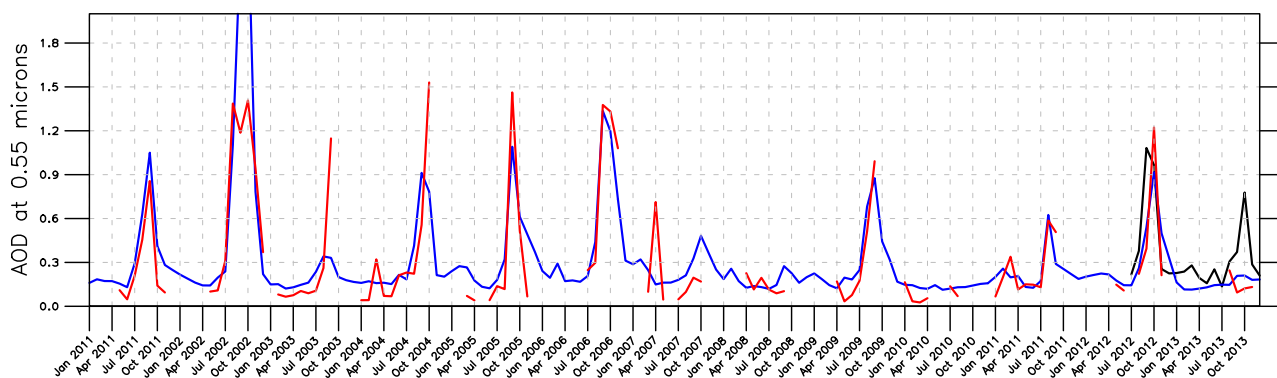

(c) Palangkaraya

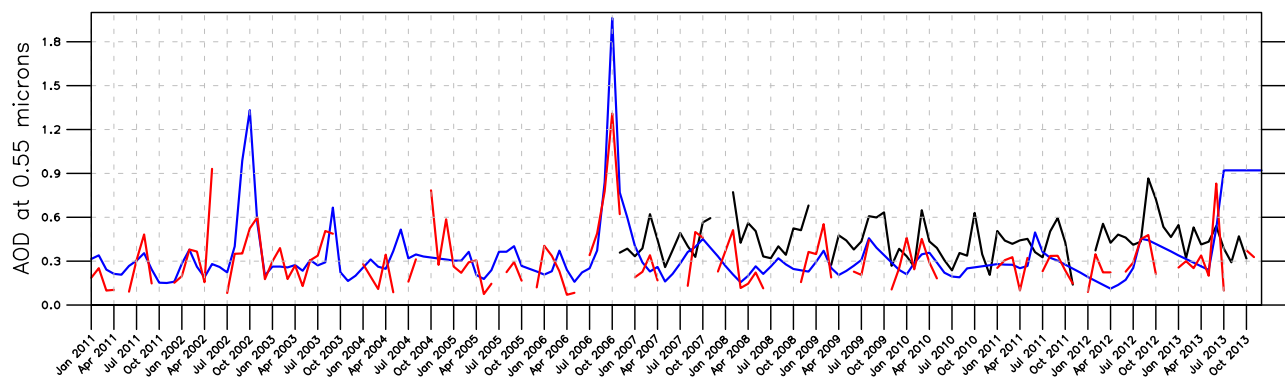

(d) Singapore

**Supplement Figure S6.** Geospatial aggregate of all fires in January 2013 over Northern Southeast Asia and Southern Southeast Asia respectively.

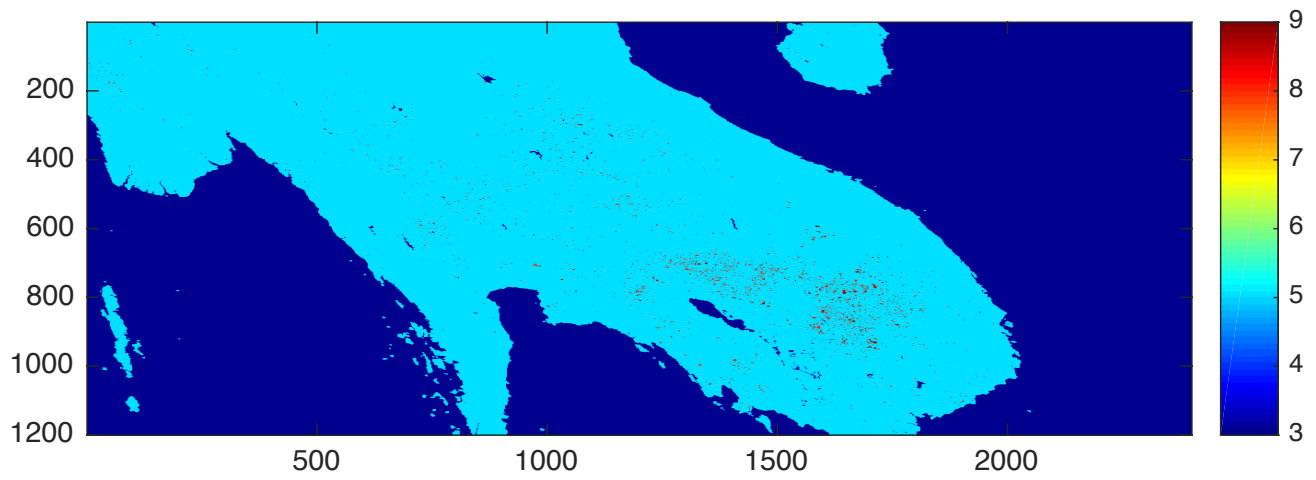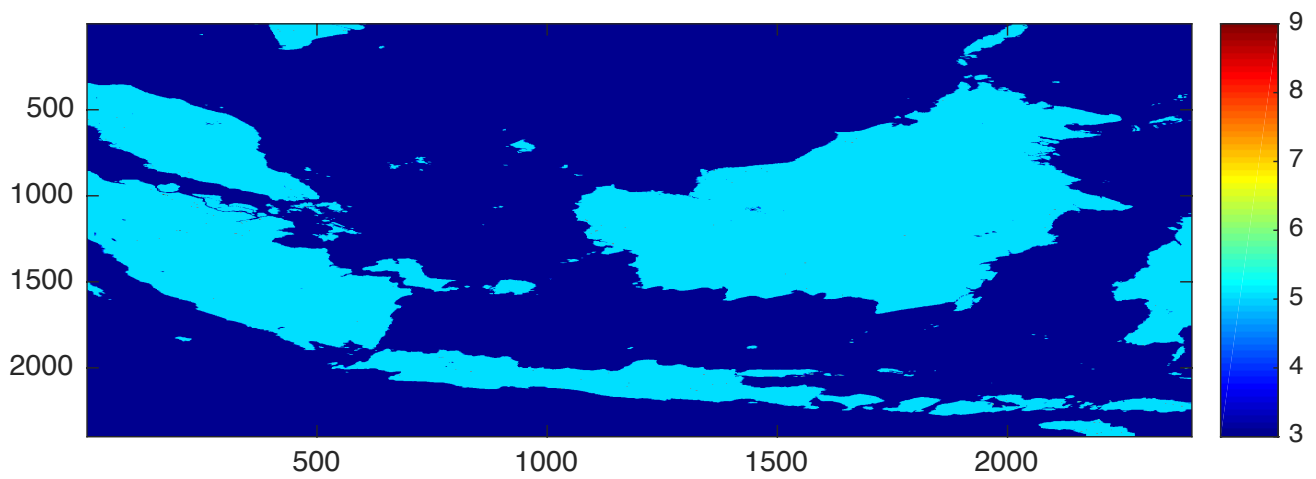

**Supplement Figure S7.** Geospatial aggregate of all fires in September 2013 over Northern Southeast Asia and Southern Southeast Asia respectively.

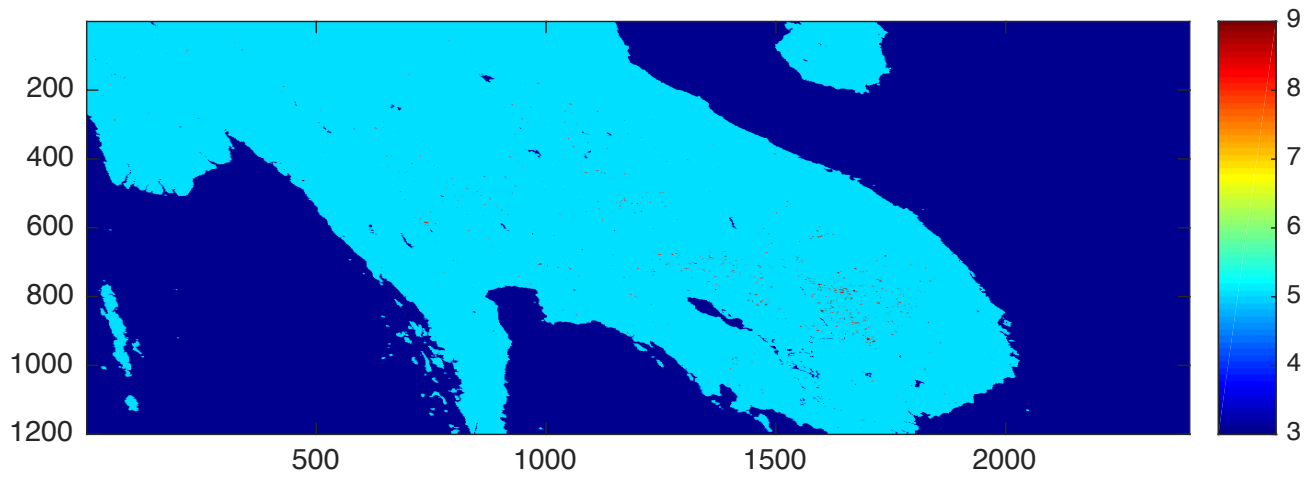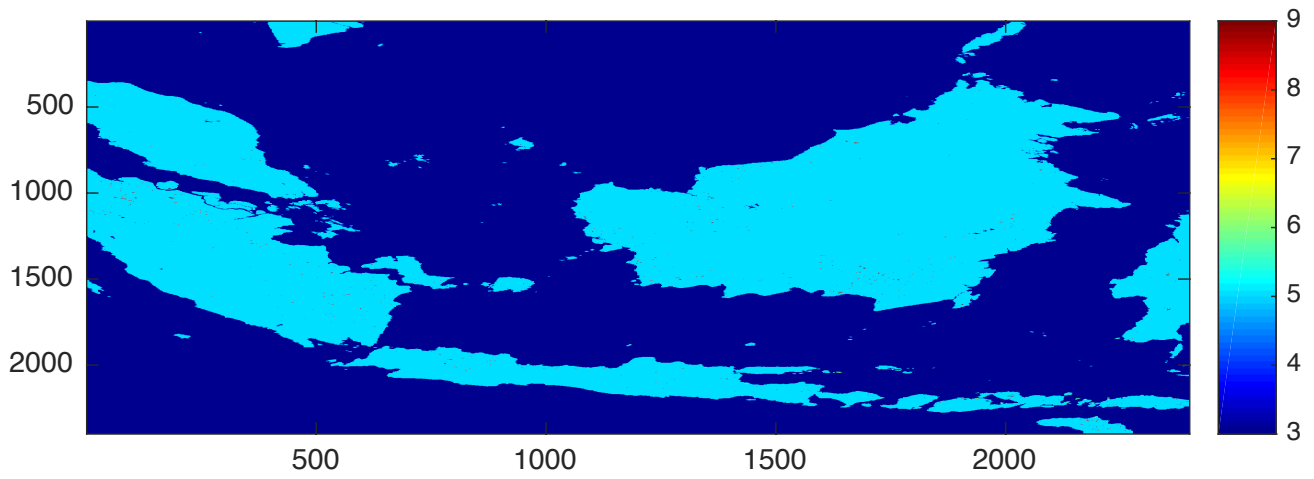



**Supplement Table S1.** Complementary information on AERONET stations: geographical location, data availability, average ( $\mu$ ) and standard deviation ( $\sigma$ ) values for AOD, LAI, and NDVI from MODIS, and environment description.

| Stations                     | Availability | AOD            | LAI            | NDVI           | Other information                               |
|------------------------------|--------------|----------------|----------------|----------------|-------------------------------------------------|
| Bac Giang, VN (North)        | 2003-2009    | m=0.57, r=0.28 | m=0.68, r=0.43 | m=0.45, r=0.15 | Rural, surrounded by crops and industrial parks |
| Chiang Mai, TH (North)       | 2006-2013    | m=0.29, r=0.17 | m=2.19, r=0.77 | m=0.61, r=0.07 | Urban, surrounded by agricultural fields        |
| Mukdahan, TH (North)         | 2003-2009    | m=0.32, r=0.16 | m=1.13, r=0.37 | m=0.55, r=0.09 | Rural, surrounded by agricultural fields        |
| Nghia Do, VN (North)         | 2010-2013    | m=0.57, r=0.29 | m=0.92, r=0.59 | m=0.42, r=0.15 | Urban                                           |
| Pimai, TH (North)            | 2003-2007    | m=0.33, r=0.17 | m=0.72, r=0.27 | m=0.49, r=0.1  | Rural, surrounded by agricultural fields        |
| Ubon Ratchathani, Th (North) | 2009-2012    | m=0.33, r=0.17 | m=1.03, r=0.33 | m=0.52, r=0.07 | Semi-urban, surrounded by agricultural fields   |
| Vientiane, LA (North)        | 2011-2012    | m=0.35, r=0.21 | m=2.03, r=0.45 | m=0.55, r=0.08 | Semi-urban, surrounded by agricultural fields   |
| Jambi, ID (South)            | 2012-2013    | m=0.36, r=0.31 | m=2.72, r=1.48 | m=0.66, r=0.11 | Rural, surrounded by jungle                     |
| Kuching, MY (South)          | 2011-2013    | m=0.31, r=0.32 | m=3.75, r=1.65 | m=0.7, r=0.1   | Rural, surrounded by jungle                     |
| Palangkaraya, ID (South)     | 2012-2013    | m=0.3, r=0.37  | m=3.21, r=1.43 | m=0.69, r=0.11 | Rural, surrounded by jungle                     |
| Singapore, SG (South)        | 2006-2013    | m=0.34, r=0.25 | m=2.38, r=1.29 | m=0.42, r=0.06 | Urban                                           |

**Supplement Table S2.** Error and correlation between the reconstructed AOD versus AERONET and MISR on a monthly basis over the Northern region for the whole 2001-2013 period. Overlapped periods between AODNorth, AODSouth, and AERONET, on one hand, and between AODNorth, AODSouth, and MISR on the other hand, are stated in parenthesis.

| Stations                              | AERONET     | MISR        |
|---------------------------------------|-------------|-------------|
|                                       | Err/Corr(%) | Err/Corr(%) |
| Chiang Mai (65/156) – (129/156)       | -0.09/82    | 0.02/77     |
| Bac Giang (49/156) – (127/156)        | -0.03/73    | 0.1/72      |
| Mukdahan (72/156) – (135/156)         | 0.0/78      | 0.04/79     |
| Nghia Do (28/156) – (133/156)         | -0.12/83    | 0.07/71     |
| Pimai (41/156) – (145/156)            | 0.02/70     | 0.03/66     |
| Ubon Ratchathani (32/156) – (136/156) | 0.0/90      | 0.05/74     |
| Vientiane (15/156) – (127/156)        | -0.01/76    | 0.02/81     |
| Jambi (18/156) – (79/156)             | -0.14/57    | 0.06/69     |
| Kuching (25/156) – (114/156)          | -0.06/71    | 0.1/64      |
| Palangkaraya (18/156) – (102/156)     | -0.11/73    | 0.04/79     |
| Singapore (78/156) – (122/156)        | -0.11/-2*   | 0.04/57     |

\* not statistically significant at the  $p = 0.05$  level.
